# Supplementary material
Source: PubMed Central journal article supplement (PMC6442642)
Supplement: pnas.1820569116.sapp.pdf [file pnas.1820569116.sapp.pdf]

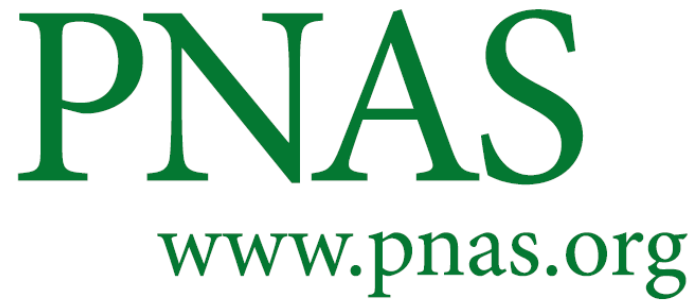

## Supplementary Information for

Earlier phenology of a nonnative plant increases impacts on native competitors

Jake M. Alexander, Jonathan M. Levine

Corresponding author: Jake M. Alexander

Email: [jake.alexander@usys.ethz.ch](mailto:jake.alexander@usys.ethz.ch)

### **This PDF file includes:**

Supplementary text  
Figs. S1 to S2  
Tables S1 to S3  
Caption for database S1

## Supplementary Information Text

### Supplementary Materials and Methods

**Estimation of focal plant fecundity.** To estimate fecundity, we counted flower heads of all focal individuals in the field. Native species were sampled between early-April and mid-May when focal individuals had completed flowering and senesced. For some species we noted considerable variation in the size of flower heads, which we accounted for in our estimates of total plant fecundity. To do so, we measured the length (*P. erecta*, *V. microstachys*) or diameter (*N. atractyloides*, *S. columbariae*) of every inflorescence per focal individual, and for each taxon collected 16–32 (mean 25.2) mature inflorescences that had not dehisced to count seed number per inflorescence. For *P. erecta*, *S. columbariae* and *V. microstachys* we predicted seed number per inflorescence from linear models of seed number on inflorescence size ( $R^2 = 0.80-0.92$ , seed number square-root transformed for *S. columbariae*). For *N. atractyloides* we estimated seed numbers within three size classes, and for *L. californica* and each *L. serriola* population we simply estimated the average seed number per inflorescence. The fecundity of each focal individual was then calculated as the sum of the seed numbers in each inflorescence.

*L. serriola* plants (both focal individuals and background competitors) were harvested before their seeds had ripened to prevent release of seed into the environment.

Inflorescence counts of focal *L. serriola* individuals included both mature flowers/ripening seed heads and immature buds. To confirm that this approach did not lead to an underestimation of lifetime fecundity, we covered 20 individuals with netting to prevent seed release until the plants had senesced, at which time we counted the number of inflorescences that had produced seeds. The intercept of the relationship between initial and final (bagged) inflorescence counts was not significantly different from 0 (linear model,  $P = 0.295$ ), and the slope not significantly different from 1 (t-test,  $P = 0.987$ ), so we conclude that early harvesting did not bias fecundity estimates for *L. serriola*.

**Estimating native species persistence.** To test the hypothesis that differences in *L. serriola* phenology affect the ability of native species to persist with *L. serriola*, we parameterised a mathematical model describing how competition affects the population growth of annual plants. Full details of the model are given by Godoy and Levine (17) and are summarized here. The per capita population growth rate of an annual plant can be described by:

$$\frac{N_{i,t+1}}{N_{i,t}} = (1 - g_i)s_i + g_i F_i \quad (1)$$

where  $N_i$  is the population size (seed number) of focal species  $i$  prior to germination in year  $t$ ,  $g_i$  is the germination rate of those seeds,  $s_i$  is the annual survival of ungerminated seeds in the soil seed bank, and  $F_i$  is the per germinant fecundity of species  $i$ .  $F_i$  is a Beverton-Holt function of both intra- and interspecific competitors as follows:

$$F_i = \frac{\lambda_i}{1 + \alpha_{ii}g_i N_{i,t} + \alpha_{ij}g_j N_{j,t}} \quad (2)$$

where  $\lambda_i$  is the per germinant fecundity in the absence of competition, and  $\alpha_{ij}$  is the per capita effect of species  $j$  on the fecundity of species  $i$ .

From this model we can derive the low-density growth rate (LDGR; also known as the invasion growth rate) of a focal species  $i$ , that is its ability to recover from low density when its competitor  $j$  is at its single species equilibrium abundance (equation A.14 in ref. 17):

$$\frac{N_{i,t+1}}{N_{i,t}} = (1 - g_i)(s_i) + \frac{\lambda_i g_i}{1 + \alpha_{ij} g_j \left( \frac{1}{\alpha_{jj} g_j} \left[ \frac{\lambda_j g_j}{1 - (1 - g_j)(s_j)} - 1 \right] \right)} \quad (3)$$

We used equation 3 and the parameters estimated in the field experiment to calculate the LDGR of each native species  $i$  in the presence of each *L. serriola* population  $j$ . We obtained the parameters  $\lambda_i$  and  $\alpha_{ij}$  as described above. *L. serriola* focal individuals experienced high mortality, especially in the competition plots, and so we did not

estimate  $\alpha_{jj}$  for each *L. serriola* population separately. Instead we fitted a model including all *L. serriola* individuals, irrespective of origin, to estimate a common *L. serriola* intraspecific competition coefficient ( $\alpha_{jj}$ ), with  $\lambda_j$  taken to be the average per germinant fecundity across all individuals with data, weighted by survival probability. Models fitted with population-specific estimates of  $\lambda_j$ , and therefore population-specific estimates of  $\alpha_{jj}$ , produced qualitatively similar results (Fig. S2). This latter analysis required that we estimate  $\lambda_j$  for the Swiss population, for which there were no surviving plants growing without neighbours, as twice the 99<sup>th</sup> percentile of the fecundity of plants growing across the experiment, which approximated the upper estimate of  $\lambda_i$  based on the other populations.

We conducted additional experiments to estimate germination rates,  $g_i$ , and seed-bank survival rates,  $s_i$ . First, we established the viability of seeds used in the experiment by germinating 100–150 seeds per species on filter paper in a climate cabinet for 2–3 weeks. A subset of ungerminated seeds were stained with 0.25 % tetrazolium solution to estimate the fraction of viable but dormant seeds. We then summed the number of germinated and dormant seeds to estimate the viable seed proportion. We estimated  $g_i$  in the field as the fraction of germinants emerging from 13–15 (mean 14.5) stations per species, where each station was sown with 100 viable seeds in plots without competitors. To estimate  $s_i$ , we buried nylon mesh bags each containing 100 viable seeds of one of the species (n=6 per species) at the field site in November 2014. Seed bags were retrieved at the end of the growing season in August 2015, and the fractions of surviving seed were calculated from the number of viable seeds before and after a year of burial (based on germination trials and tetrazolium staining as previously described). For *N. atractyloides*, we counted more viable seeds after than before burial, so we set its seed-bank survival to  $s = 1$ .

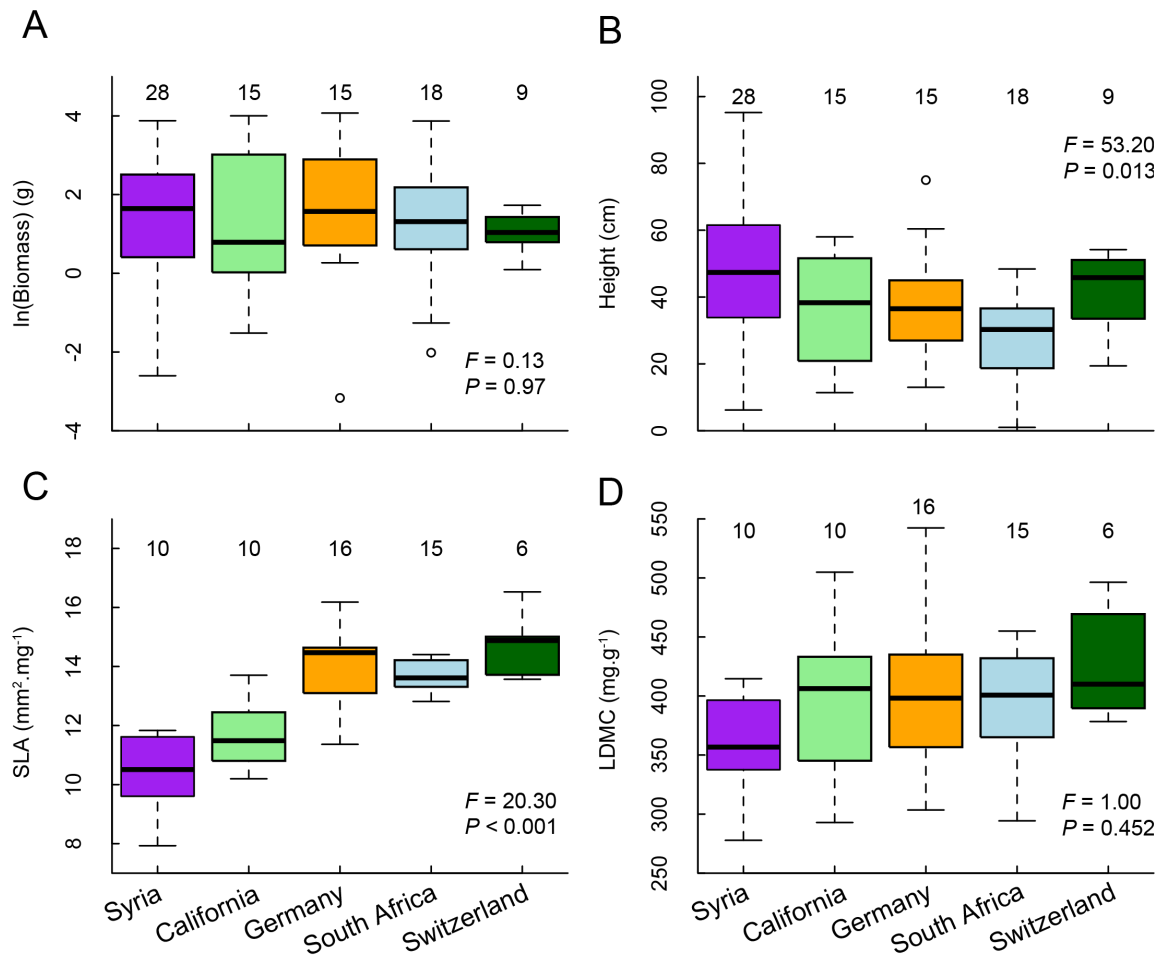

**Fig. S1.** Variation in aboveground biomass, height, specific leaf area (SLA) and leaf dry matter content (LDMC) between *L. serriola* plants originating from five populations (countries/USA states) and grown in a field site in southern California. Aboveground biomass and total plant height were determined from 9–28 (mean 17) flowering *L. serriola* individuals from each population that were harvested before they released seeds. SLA and LDMC were determined from 2–4 (mean 2.9) undamaged leaves from 6–16 (mean 11.4) individuals per population, collected in June 2015 from background competitor plants that had bolted or were flowering. Statistics indicate support for differences in population means from mixed effects models accounting for experimental plot as a random effect. Sample sizes for each population and trait are indicated above the box-and-whisker plots.

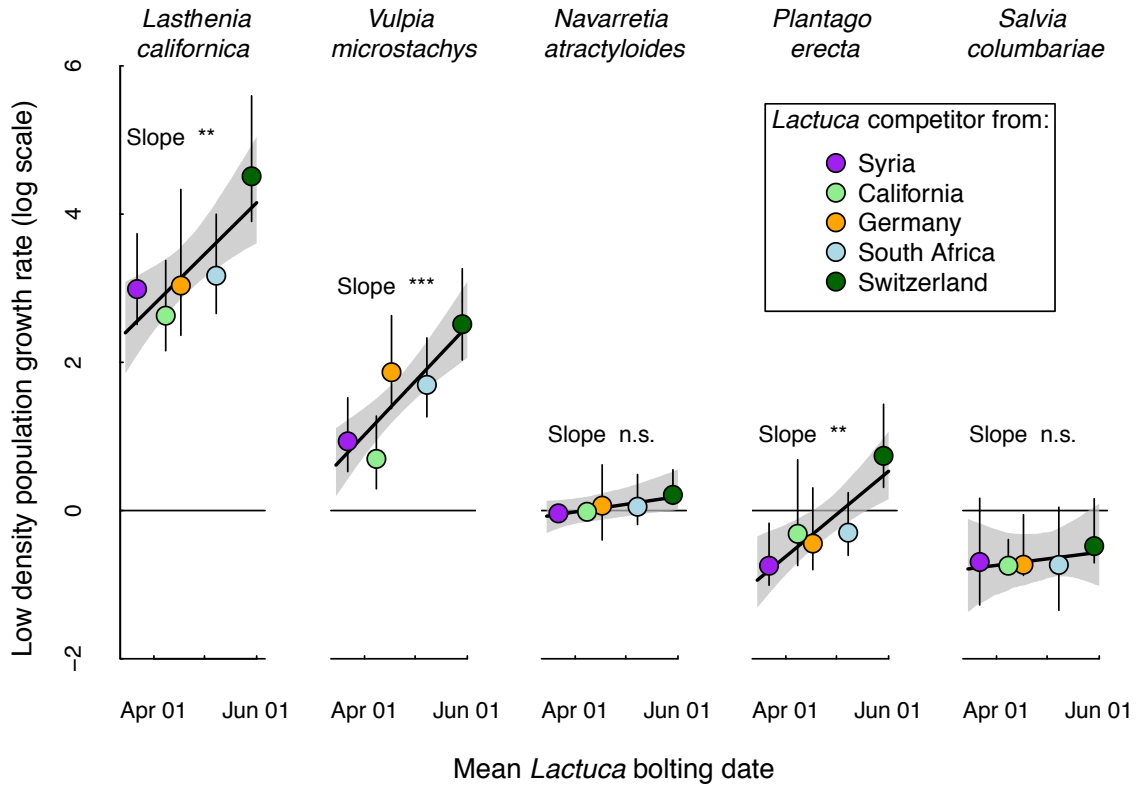

**Fig. S2.** Predicted low-density growth rates (LDGR) of five native species in competition with five *L. serriola* populations in an experimental garden in southern California, plotted against the mean bolting date of the *L. serriola* population. The estimates differ from those shown in Fig. 5 in that here LDGRs are calculated accounting for differences between *L. serriola* populations in fecundity in the absence of competition ( $\lambda_j$ ) and in per capita intraspecific competitive effects ( $\alpha_{jj}$ ; see Materials & Methods). LDGR estimates are log-transformed, so that positive values predict that a focal species will persist with *L. serriola*, whilst negative values predict that they will be competitively excluded. Error bars and grey shading indicate the 95 % confidence intervals around estimates of LDGR and the regression slopes, respectively, accounting for variance in estimates of each *L. serriola* population's competitive effect on a native species (see Materials and Methods). \*\*\*  $P < 0.001$ ; \*\*  $P < 0.01$ ; n.s.  $P > 0.05$ .

**Table S1. Estimates of low-density population growth rates (LDGR) of native California species competing with *L. serriola* originating from one of five geographic areas. Values in parentheses are 95 % confidence intervals accounting for uncertainty in estimates of *L. serriola*'s competitive effect on native species ( $\alpha_{ij}$ ; shown in Fig. 5), or propagating uncertainty in all eight parameters of the expression for LDGR (equation 3 in Supplementary Materials and Methods).**

| Focal taxon ( <i>i</i> ) | Source of uncertainty | LDGR <sub><i>i</i>,Germany</sub> | LDGR <sub><i>i</i>,South Africa</sub> | LDGR <sub><i>i</i>,Syria</sub> | LDGR <sub><i>i</i>,California</sub> | LDGR <sub><i>i</i>,Switzerland</sub> |
|--------------------------|-----------------------|----------------------------------|---------------------------------------|--------------------------------|-------------------------------------|--------------------------------------|
| <i>L. californica</i>    | $\alpha_{ij}$ only    | 2.99 (2.32, 4.29)                | 3.51 (3.00, 4.34)                     | 2.65 (2.18, 3.40)              | 2.83 (2.36, 3.58)                   | 4.48 (3.87, 5.56)                    |
|                          | All parameters        | 2.57 (-1.31, 6.88)               | 3.09 (-0.96, 7.29)                    | 2.22 (-1.48, 6.34)             | 2.40 (-1.38, 6.55)                  | 4.10 (-0.27, 8.36)                   |
| <i>N. atractyloides</i>  | $\alpha_{ij}$ only    | 0.06 (-0.40, 0.60)               | 0.10 (-0.01, 0.65)                    | -0.05 (-0.06, 0.01)            | 0.00 (-0.04, 0.12)                  | 0.20 (0.08, 0.53)                    |
|                          | All parameters        | 0.07 (-1.01, 1.88)               | 0.09 (-1.07, 2.05)                    | -0.05 (-0.46, 0.42)            | -0.01 (-0.74, 0.99)                 | 0.16 (-1.19, 2.31)                   |
| <i>P. erecta</i>         | $\alpha_{ij}$ only    | -0.47 (-0.82, 0.27)              | -0.05 (-0.40, 0.53)                   | -0.90 (-1.12, -0.40)           | -0.17 (-0.63, 0.87)                 | 0.71 (0.29, 1.41)                    |
|                          | All parameters        | -0.69 (-3.01, 2.61)              | -0.34 (-2.90, 3.23)                   | -1.04 (-3.09, 1.69)            | -0.43 (-2.93, 3.18)                 | 0.34 (-2.62, 4.26)                   |
| <i>S. columbariae</i>    | $\alpha_{ij}$ only    | -0.74 (-0.88, -0.08)             | -0.65 (-0.86, 0.28)                   | -0.76 (-1.35, -0.06)           | -0.70 (-0.83, -0.30)                | -0.49 (-0.71, 0.14)                  |
|                          | All parameters        | -0.83 (-2.79, 1.30)              | -0.73 (-2.78, 1.79)                   | -0.84 (-2.80, 1.28)            | -0.81 (-2.78, 1.27)                 | -0.63 (-2.73, 2.00)                  |
| <i>V. microstachys</i>   | $\alpha_{ij}$ only    | 1.82 (1.33, 2.59)                | 2.04 (1.61, 2.67)                     | 0.59 (0.18, 1.18)              | 0.90 (0.50, 1.48)                   | 2.48 (2.00, 3.23)                    |
|                          | All parameters        | 1.50 (-2.56, 5.61)               | 1.72 (-2.34, 5.80)                    | 0.25 (-3.71, 4.31)             | 0.56 (-3.44, 4.61)                  | 2.17 (-1.89, 6.23)                   |

**Table S2. Parameters ( $\pm$  standard error) derived from the competition experiment and used to fit models of competitive population dynamics. Parameters include estimates of the mean survival-weighted fecundity of plants growing without neighbours ( $\lambda_i$ ), and competition coefficients ( $\alpha_{ij}$ ) describing the per capita effects of competitor  $j$  (*L. serriola* originating from one of five geographic areas) on focal taxon  $i$  (one of five native Californian species, or *L. serriola* population). *L. serriola* individuals from each population were also pooled (“*Lactuca*”) to estimate parameters at the species level.**

| Focal taxon ( $i$ )     | $\lambda_i$  | $\alpha_{i,Germany}$ | $\alpha_{i,South\ Africa}$ | $\alpha_{i,Syria}$ | $\alpha_{i,California}$ | $\alpha_{i,Switzerland}$ | $\alpha_{i,Lactuca}$ | Seed viability | Seed bank survival ( $s$ ) | Germination rate ( $g$ ) |
|-------------------------|--------------|----------------------|----------------------------|--------------------|-------------------------|--------------------------|----------------------|----------------|----------------------------|--------------------------|
| <i>L. californica</i>   | 15339 (2460) | 0.79 (0.32)          | 0.45 (0.14)                | 1.06 (0.30)        | 0.88 (0.25)             | 0.17 (0.06)              | NA                   | 0.67           | 0.50 (0.12)                | 0.35 (0.06)              |
| <i>N. atractyloides</i> | 751 (197)    | 1.25 (0.77)          | 0.99 (0.56)                | 7.71 (3.31)        | 2.59 (1.01)             | 0.53 (0.18)              | NA                   | 0.50           | 1.00                       | 0.07 (0.02)              |
| <i>P. erecta</i>        | 647 (96)     | 1.26 (0.44)          | 0.65 (0.18)                | 2.87 (0.95)        | 0.83 (0.33)             | 0.26 (0.07)              | NA                   | 0.98           | 0.32 (0.05)                | 0.26 (0.05)              |
| <i>S. columbariae</i>   | 2646 (494)   | 17.14 (9.77)         | 11.34 (7.25)               | 18.92 (12.04)      | 13.74 (5.57)            | 6.50 (2.64)              | NA                   | 0.96           | 0.47 (0.09)                | 0.18 (0.04)              |
| <i>V. microstachys</i>  | 950 (156)    | 0.25 (0.07)          | 0.20 (0.05)                | 0.85 (0.20)        | 0.62 (0.15)             | 0.13 (0.04)              | NA                   | 0.78           | 0.01 (0.01)                | 0.60 (0.07)              |
| Germany                 | 1167 (681)   | NA                   | NA                         | NA                 | NA                      | NA                       | 0.98 (0.34)          | 0.95           | 0.58 (0.13)                | 0.16 (0.04)              |
| South Africa            | 904.05 (400) | NA                   | NA                         | NA                 | NA                      | NA                       | 0.75 (0.25)          | 0.85           | 0.73 (0.05)                | 0.18 (0.07)              |
| Syria                   | 2501 (714)   | NA                   | NA                         | NA                 | NA                      | NA                       | 2.17 (0.67)          | 0.97           | 0.67 (0.09)                | 0.09 (0.03)              |
| California              | 1026 (378)   | NA                   | NA                         | NA                 | NA                      | NA                       | 0.86 (0.34)          | 0.97           | 0.73 (0.11)                | 0.15 (0.05)              |
| Switzerland             | 228          | NA                   | NA                         | NA                 | NA                      | NA                       | 0.16 (0.07)          | 0.99           | 0.67 (0.11)                | 0.10 (0.03)              |
| <i>Lactuca</i>          | 1607 (353)   | NA                   | NA                         | NA                 | NA                      | NA                       | 1.38 (0.52)          | NA             | 0.68 (0.04)                | 0.14 (0.02)              |



**Table S3. Origins of the 26 *L. serriola* populations included in the common garden experiment. The five populations included in the competition experiment are indicated with asterisks. Population codes (“Pop”) correspond to codes used in ref. 20.**

| Pop    | Country      | Range      | Latitude | Longitude |
|--------|--------------|------------|----------|-----------|
| Ls002  | Australia    | Introduced | -35.4300 | 149.7800  |
| Ls004  | Australia    | Introduced | -42.6800 | 147.3200  |
| Ls005  | Australia    | Introduced | -37.8194 | 145.0000  |
| Ls006  | Canada       | Introduced | 49.1247  | -123.1784 |
| Ls007  | Canada       | Introduced | 49.9397  | -119.3930 |
| Ls008  | Canada       | Introduced | 49.1482  | -116.5349 |
| Ls021  | France       | Native     | 43.7432  | 4.7925    |
| Ls026* | Germany      | Native     | 51.3117  | 12.2377   |
| Ls029  | Italy        | Native     | 41.2889  | 13.9839   |
| Ls032  | Netherlands  | Native     | 51.6667  | 5.3333    |
| Ls039  | Spain        | Native     | 36.6392  | -4.4958   |
| Ls040  | Sweden       | Native     | 56.6164  | 16.4579   |
| Ls049  | Switzerland  | Native     | 46.8298  | 9.4095    |
| Ls051  | UK           | Native     | 51.3811  | -2.6444   |
| Ls060  | South Africa | Introduced | -33.9553 | 18.8086   |
| Ls064  | South Africa | Introduced | -33.8828 | 18.6333   |
| Ls066* | South Africa | Introduced | -28.0003 | 24.7500   |
| Ls074  | Syria        | Native     | 33.4500  | 36.2833   |
| Ls075* | Syria        | Native     | 34.7167  | 36.4000   |
| Ls077  | Armenia      | Native     | 40.2000  | 44.2500   |
| Ls087  | Azerbaijan   | Native     | 39.2667  | 48.4833   |
| Ls093  | Israel       | Native     | 31.9896  | 34.8982   |
| Ls096  | Oregon       | Introduced | 45.4138  | -117.8291 |
| Ls099  | Oregon       | Introduced | 45.4093  | -117.8933 |
| Ls112* | California   | Introduced | 34.7389  | -120.0261 |
| Ls114* | Switzerland  | Native     | 47.4031  | 8.5489    |

**Database S1. Fecundity and neighbour density data for focal individuals of *L. serriola* and native species in the competition experiment, including bolting date for *L. serriola*.**

|                      |                                                                                                                                                                                                                                                                                                  |
|----------------------|--------------------------------------------------------------------------------------------------------------------------------------------------------------------------------------------------------------------------------------------------------------------------------------------------|
| ID:                  | Unique identifier for each focal individual.                                                                                                                                                                                                                                                     |
| Plot:                | Unique identifier for each experimental plot.                                                                                                                                                                                                                                                    |
| Background:          | “Lactuca” if plot was sown with <i>L. serriola</i> as a background competitor, else “none”.                                                                                                                                                                                                      |
| Lactuca_background:  | Origin of the <i>L. serriola</i> background competitor: “CA”, California; “CH”, Switzerland; “DE”, Germany; “SA”, South Africa; “SY”, Syria; “none” if no background competitor.                                                                                                                 |
| Focal_taxon:         | Identity of the focal individuals; native species: “Las”, <i>Lasthenia californica</i> ; “Nav”, <i>Navarretia atractyloides</i> ; “Pla”, <i>Plantago erecta</i> ; “Sal”, <i>Salvia columbariae</i> ; “Vul”, <i>Vulpia microstachys</i> . <i>L. serriola</i> origins as for “Lactuca_background”. |
| Neighbour_abundance: | The number of seedlings counted within a 7.5 cm radius of the focal individual.                                                                                                                                                                                                                  |
| Date_bolting:        | For <i>L. serriola</i> focal individuals, the date when bolting was first observed.                                                                                                                                                                                                              |
| Fecundity:           | The estimated seed production of a focal individual.                                                                                                                                                                                                                                             |
| Survival:            | Whether or not a focal individual survived to produce seeds.                                                                                                                                                                                                                                     |

**Additional database S1 (separate file)**
